# Supplementary material for: Helianthus-like cucurbit[4]uril and cucurbit[5]uril analogues
Source: Royal Society of Chemistry journal article supplement (doi:10.1039/c7nj01595j), 2017-01-01
Supplement: c7nj01595j1.pdf [file c7nj01595j1.pdf]

## Helianthus-like Cucurbit[4]uril and Cucurbit[5]uril analogues

Yufan Wu, Lixi Xu, Yenan Shen, Yang Wang, Qiaochun Wang\*

*Key Laboratory for Advanced Materials and Institute of Fine Chemicals, School of Chemistry & Molecular Engineering, East China University of Science & Technology, Shanghai 200237, P.R. China.*

\* Corresponding author: qcwang@ecust.edu.cn.

### Supporting information

#### Table of contents:

|                                                         |    |
|---------------------------------------------------------|----|
| 1. General methods .....                                | 2  |
| 2. Experimental section .....                           | 2  |
| 3. Removal of Ca <sup>2+</sup> .....                    | 4  |
| 4. Preparation of the single crystal of CyP-TD[n] ..... | 4  |
| 5. The solubility measurements of the CyP-TD[n] .....   | 5  |
| 6. Supplementary Figures .....                          | 6  |
| 7. Details of the X-ray Crystal Structure .....         | 12 |
| References .....                                        | 15 |

## 1. General methods

$^1\text{H}$  NMR and  $^{13}\text{C}$  NMR spectra were measured on a Bruker AV-400 spectrometer. The molecular mass spectra were recorded on a 4800 Plus M-TOF/TOF Analyzer (AB SCIEX, USA) and a Waters LCT Premier XE mass spectrometer. Thermal stability were measured by thermogravimetric analysis with model SDT Q600 V8.3 Build 101.

Materials: 2,2-Dimethyl-1,3-propanediol was purchased from Aldrich and was used directly; cyclopentane-1,1-dicarbaldehyde (**1**) was prepared from diethyl malonate (Scheme S1) according the literature.<sup>[1]</sup> Other commercially available chemicals were used without further purification.

## 2. Experimental section

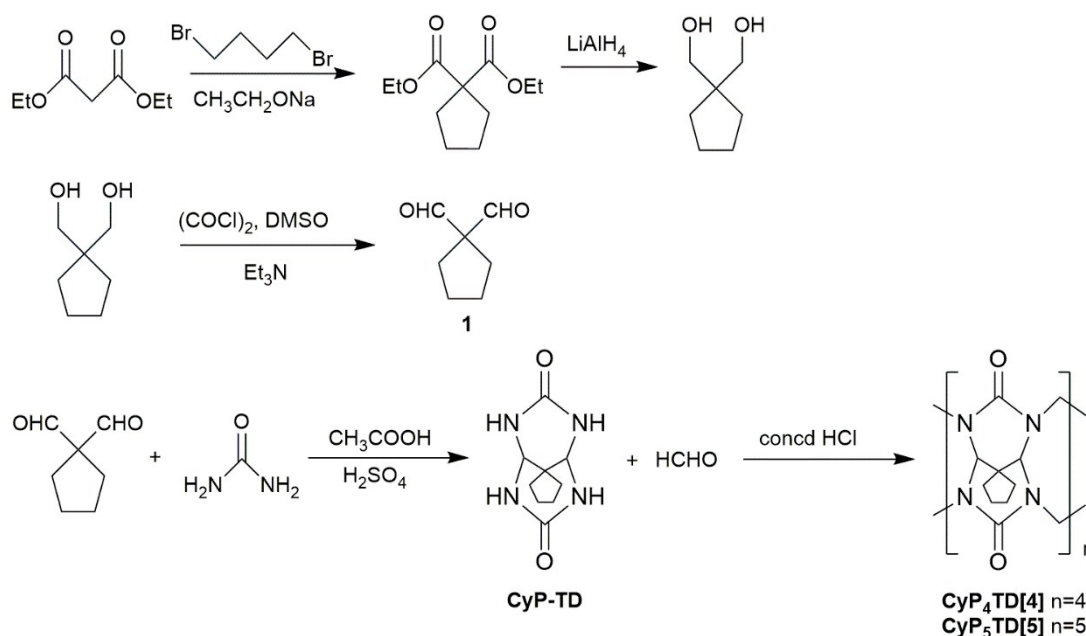

**Scheme S1.** The synthetic route of CyP-TD[n]s

### 1) Synthesis of cyclopentanopropanediurea (**CyP-TD**)

Cyclopentane-1,1-dicarbaldehyde (9ml, 0.07mol) and urea (13g, 0.22mol) were added in the mixture of acetic acid (100ml) and concentrated sulfuric acid (5ml). After stirring the mixture at 95°C for 12h, the solution was allowed to cool down to room temperature and water (600ml) was added. The precipitate was filtered and washed with acetone. The product was dried under vacuum to give **CyP-TD** as a white powder. (10.5g, 70%)

cyclopentanopropanediurea: <sup>1</sup>H NMR (400 MHz, DMSO, 298 K): δ 7.00 (d, J = 4.1Hz, 4H), 3.90 (t, J = 4.1Hz, 2H), 1.63(s, 8H). <sup>13</sup>C NMR (100 MHz, DMSO): δ 154.04, 63.39, 41.85, 32.37, 25.04. ESI-MS: m/z 233.1017 [M+Na]<sup>+</sup> (calcd 233.1014).

### 2) Synthesis of **CyP<sub>5</sub>TD[5]**

Paraformaldehyde (0.72 g, 24.0 mmol) was added into a solution of **CyP-TD** (2.10 g, 10.0mmol) in concentrated HCl (5 ml), and the mixture was then heated to 95°C for 24h. The resulting solution was cooled to room temperature. The solid was collected by filtration, and washed with 10ml 2% HCl solution. The resulting solid was dried under vacuum to yield a white powder (184mg, 8%). <sup>1</sup>H NMR (400 MHz, D<sub>2</sub>O, 298 K): δ 6.44 (d, J = 14.8 Hz, 10H) , 4.61(s, 10H) , 3.97 (d, J = 14.8 Hz, 10H) , 1.57 (m, 40H). <sup>13</sup>C NMR (100 MHz, D<sub>2</sub>O): δ 157.2, 79.3, 64.6, 43.9, 34.2, 27.7. ESI-MS m/z 1193.5486 [M+Na]<sup>+</sup>. (calcd 1193.5481)

### 3) Synthesis of **CyP<sub>4</sub>TD[4]**

To a mixture of **CyP-TD** (2.1 g, 10.0 mmol), calcium chloride (0.22g, 2mmol) and paraformaldehyde (0.72 g, 24.0 mmol) was added 37% HCl (5 mL). The mixture was then heated to 90 °C under stirring for 60 h. The resulting solid after cooling was collected by filtration. The crude product was dissolved in methanol (200ml) and then acetic ether (250ml) was added to precipitate a solid. The precipate was filtered and dried under vacuum to give **CyP<sub>4</sub>TD[4]** as a white powder a white powder (121 mg, 5%). <sup>1</sup>H NMR (400 MHz, D<sub>2</sub>O, 298 K): δ 6.44 (d, *J* = 15.1Hz, 8H), 4.76(s, 8H), 4.12 (d, *J* = 15.1Hz, 8H), 1.55 (dd, *J*<sub>1</sub> = 5.3 Hz, *J*<sub>2</sub> =17.1Hz, 32H). <sup>13</sup>C NMR (100 MHz, D<sub>2</sub>O): δ 152.35, 77.25, 62.26, 44.27, 31.86, 25.24. MALDI-TOF MS *m/z* 959.4362 [M+Na]<sup>+</sup>. (calcd 959.4365)

### 3. Removal of Ca<sup>2+</sup>

**CyP<sub>4</sub>TD[4]** with Ca<sup>2+</sup> (119.2mg, 0.1mmol) was dissolved in water (15ml). To this solution was added EDTA (58.4mg, 0.2mmol) and (CH<sub>3</sub>)<sub>4</sub>NOH (72mg, 0.8mmol). White precipitate was collected by filtration and washed thoroughly with H<sub>2</sub>O. Drying the product at 80°C yielded 45mg, 37.7%.

### 4. Preparation of the single crystal of CyP-TD[n]

The single crystal of **CyP<sub>5</sub>TD[5]** was formed from a solution of **CyP<sub>5</sub>TD[5]** (58.5mg,0.05mmol) and CaCl<sub>2</sub> (22 mg, 0.20 mmol) in

distilled water (10mL) which was allowed to slowly evaporate in air at room temperature, yielding colorless crystals within several weeks. The XRD result is shown in Fig. S15.

The single crystals of **CyP<sub>4</sub>TD[4]** (0.05 mmol in the form of Ca<sup>2+</sup> complexes obtained from the template-direct synthesis) were prepared from water solutions (10ml) by the slow diffusion of acetone vapor at room temperature. Colorless crystals were obtained after several weeks. The XRD result is shown in Fig. S15.

## **5. The solubility measurements of the CyP-TD[n]**

Excessive amounts of CyP-TD[n] (n = 4 and 5) in a deuterated solvent (0.2 mL) was stirred in a constant temperature water bath (25 °C) for 24 hours. After the removal of undissolved CyP-TD[n] by centrifuge, a 0.1 mL aliquot of the saturated CyP-TD[n] solution was diluted with 0.4 mL of D<sub>2</sub>O, and then a standard solution of tetraethylammonium bromide in D<sub>2</sub>O (0.20 M, 20 μL) was added. Tetramethylammonium chloride was used instead of tetraethylammonium bromide in those measurements using methanol-d<sub>4</sub> or DMSO-d<sub>6</sub>. The amount of dissolved CyP-TD[n] in the solution was estimated by comparing the intensities of its signals with that of the tetraethylammonium ion (or tetramethylammonium ion) in <sup>1</sup>H NMR spectrum which was recorded at 25 °C.

## 6. Supplementary Figures

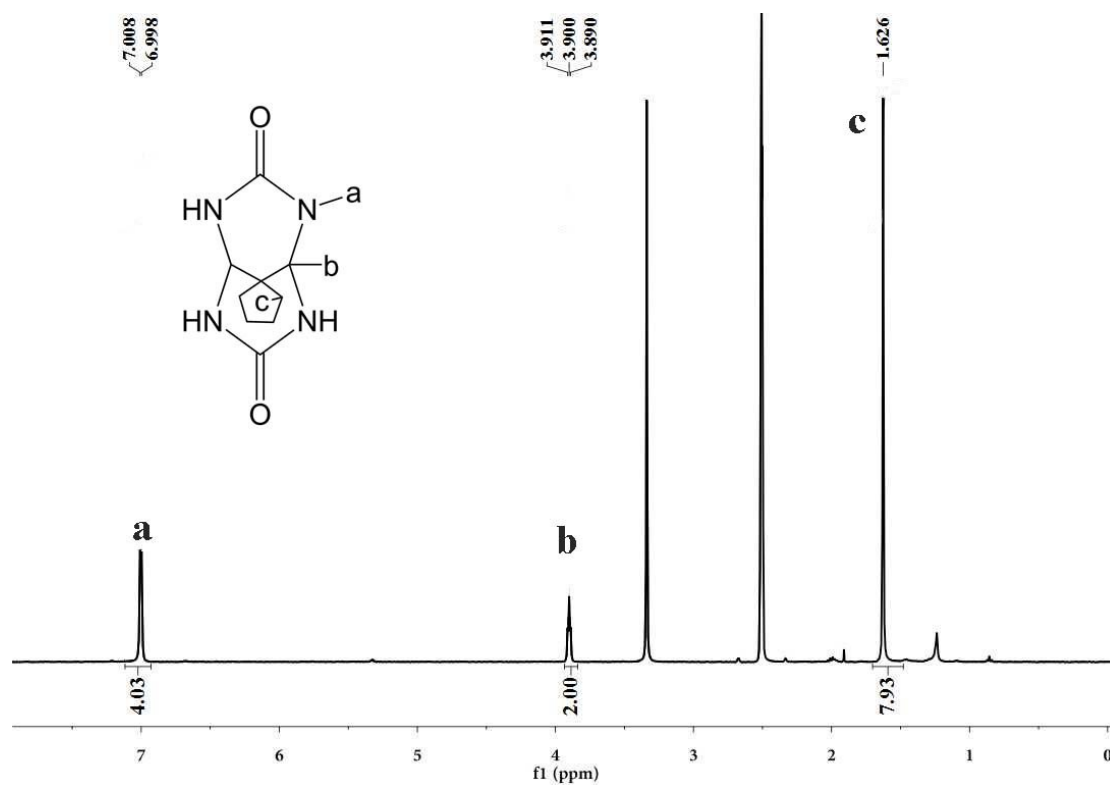

**Fig. S1**  $^1\text{H}$  NMR spectra (400MHz, 99% DMSO- $\text{d}_6$ , 298 K) of CyP-TD.

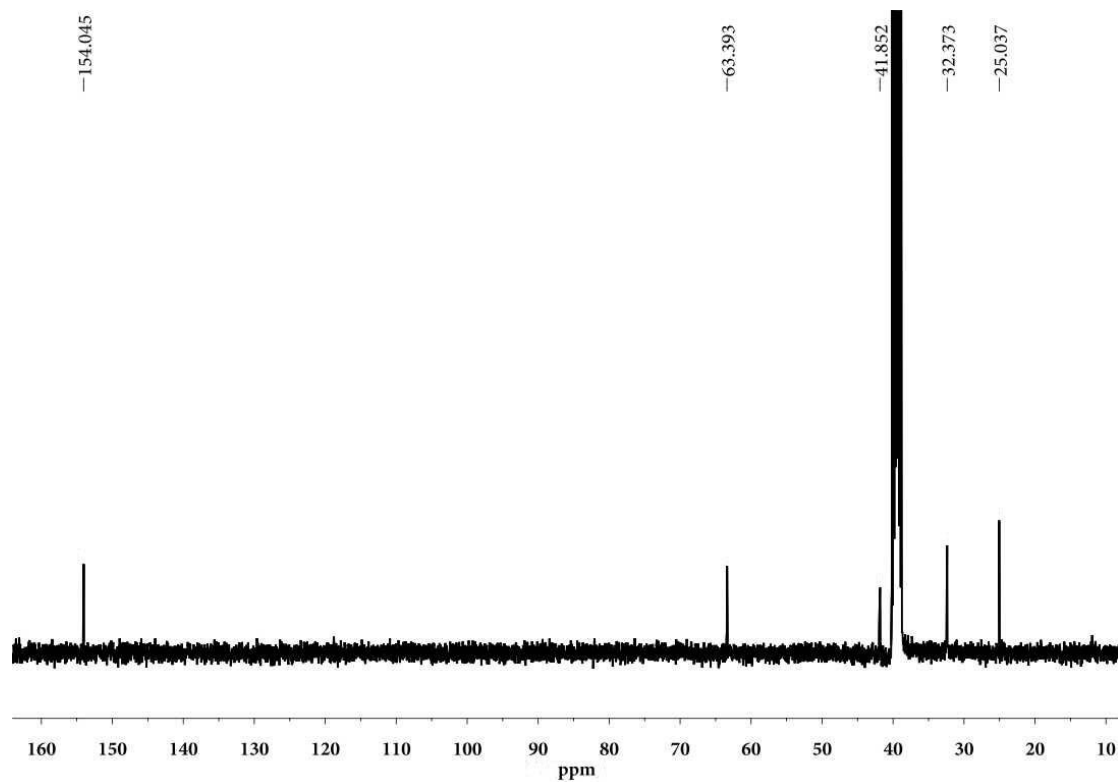

**Fig. S2**  $^{13}\text{C}$  NMR spectra (100MHz, 99% DMSO- $d_6$ , 298 K) of CyP-TD.

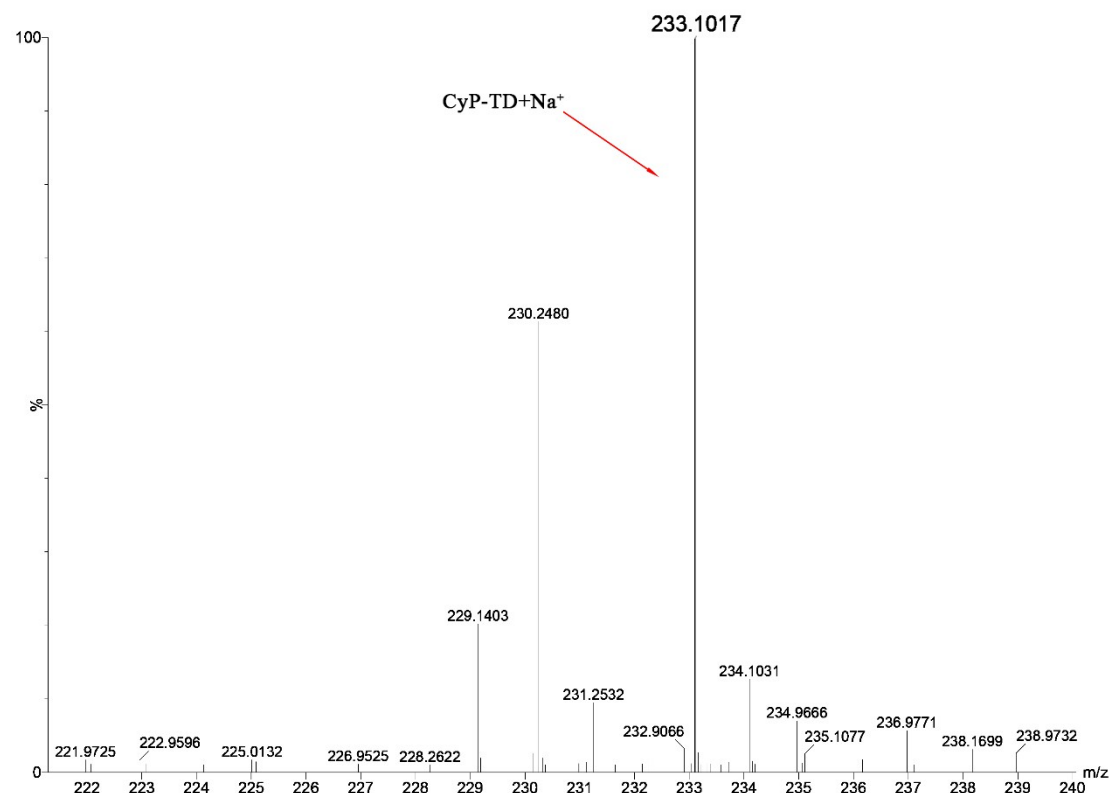

**Fig. S3** ESI-MS of CyP-TD:  $m/z$  211.1181[M+H]<sup>+</sup>.

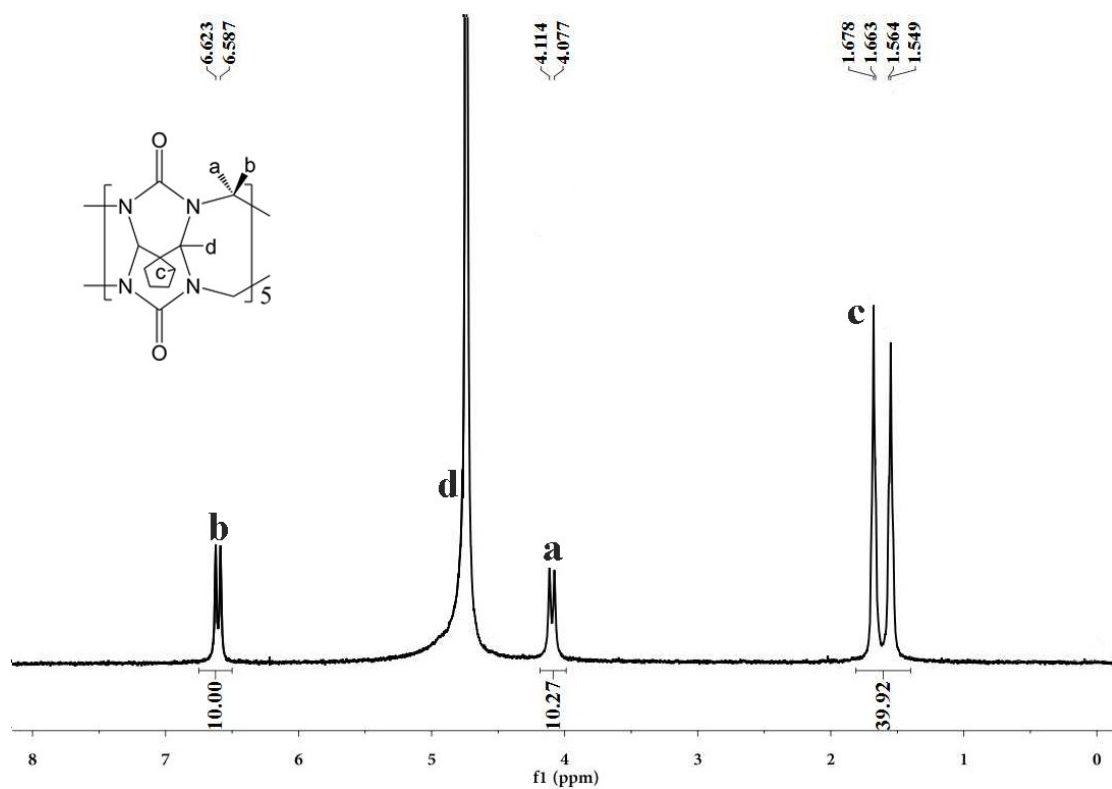

**Fig. S4**  $^1\text{H}$  NMR spectra (400MHz, 99% D<sub>2</sub>O, 298 K) of CyP<sub>5</sub>TD[5].

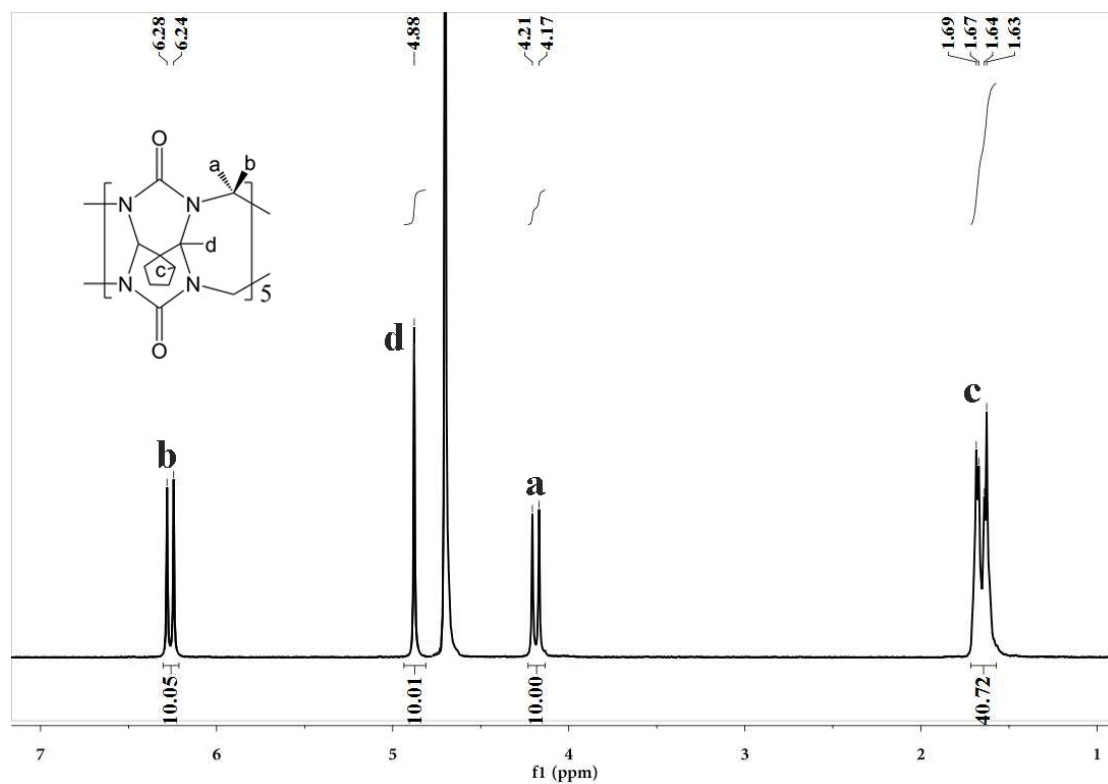

**Fig. S5**  $^1\text{H}$  NMR spectra (400MHz, 99%  $\text{D}_2\text{O}$ , 298 K) of  $\text{CyP}_5\text{TD}[5]$  in the presence of  $\text{Ca}^{2+}$ .

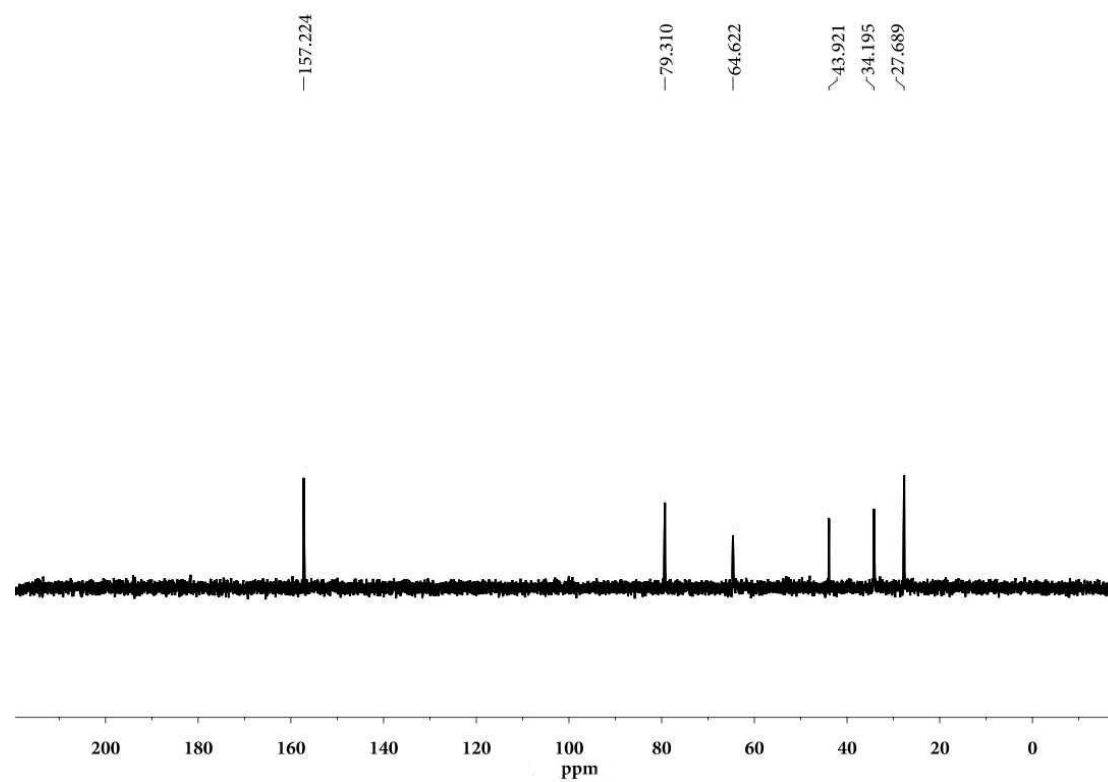

**Fig. S6**  $^{13}\text{C}$  NMR spectra (100MHz, 99%  $\text{D}_2\text{O}$ , 298 K) of  $\text{CyP}_5\text{TD}[5]$ .



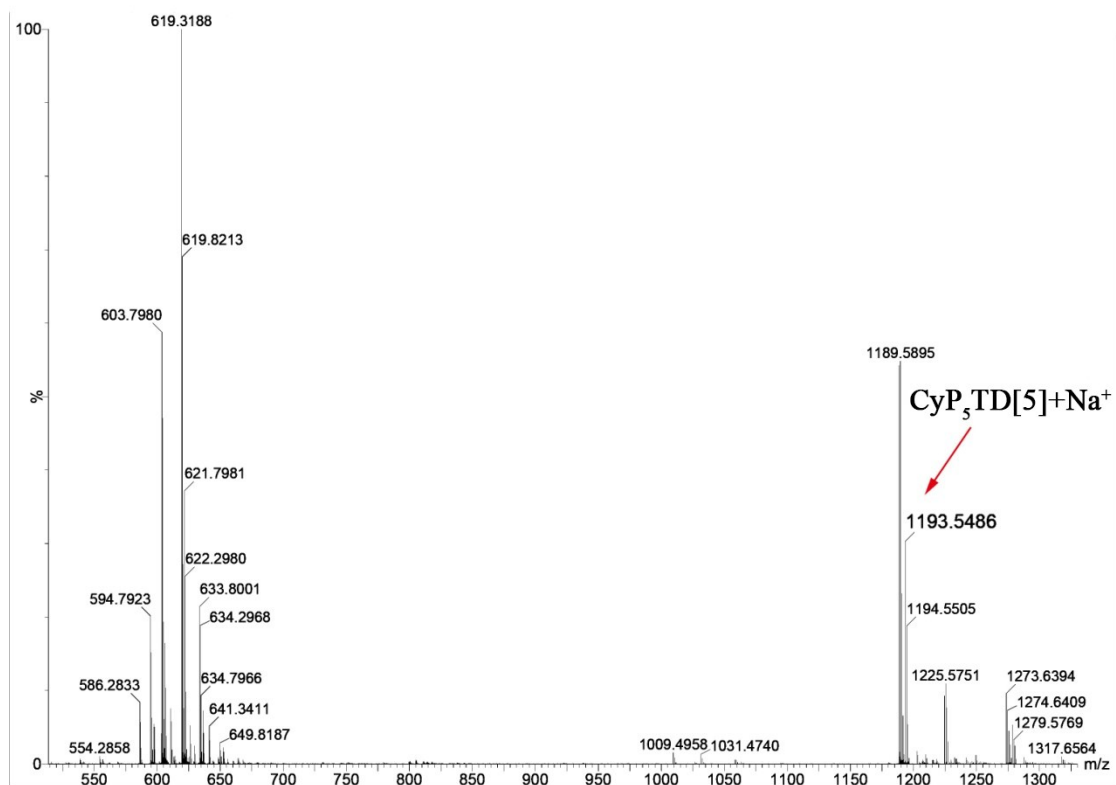

**Fig. S7** ESI-MS of  $\text{CyP}_5\text{TD}[5]$ : 1193.5486  $[\text{M}+\text{Na}]^+$ .

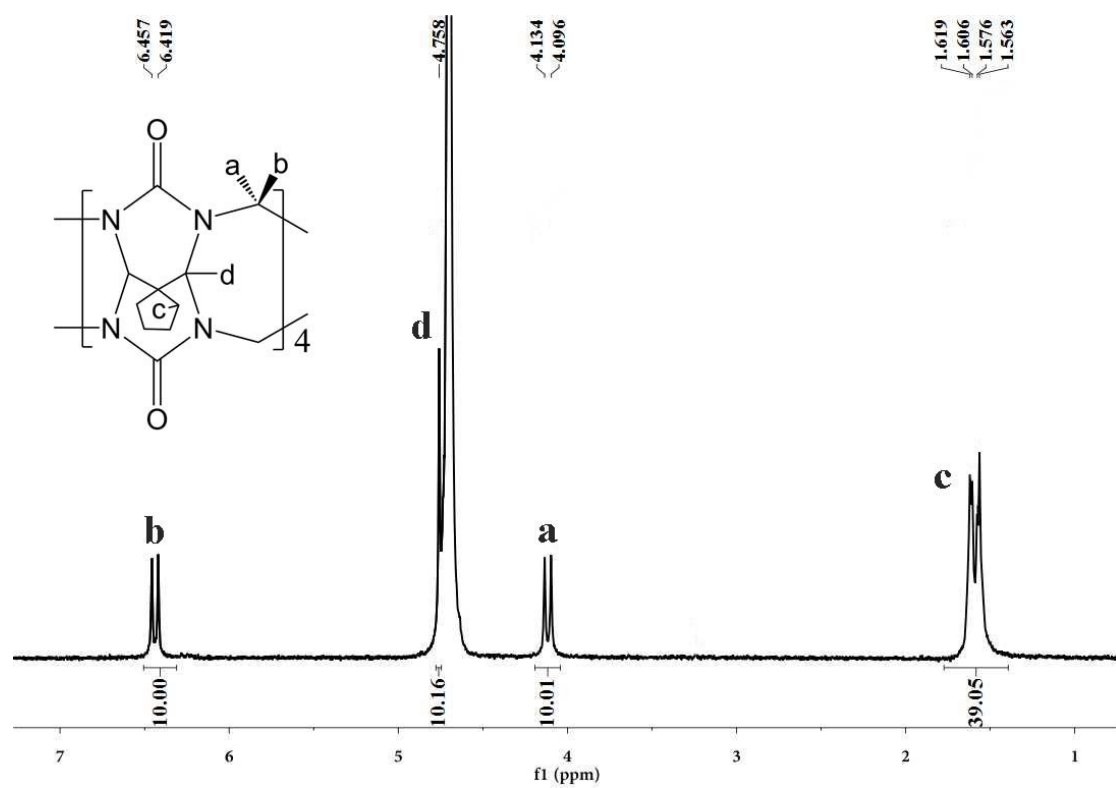

**Fig. S8**  $^1\text{H}$  NMR spectra (400MHz, 99%  $\text{D}_2\text{O}$ , 298 K) of  $\text{CyP}_4\text{TD}[4]$ .

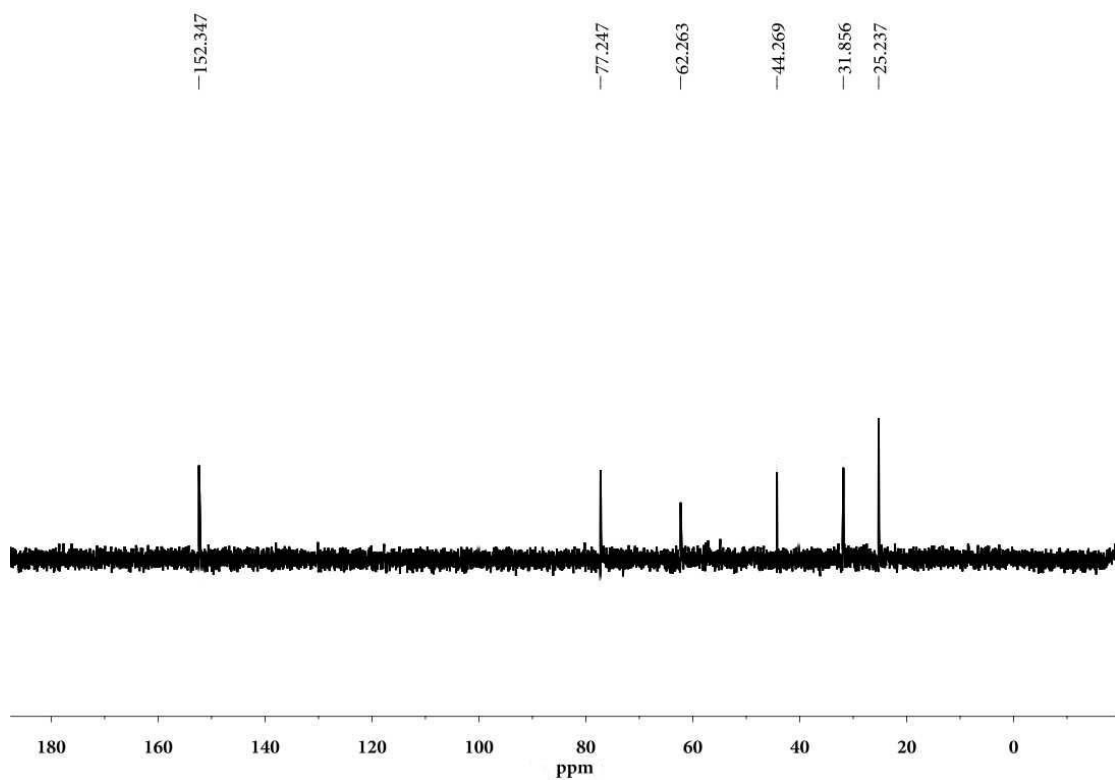

**Fig. S9**  $^{13}\text{C}$  NMR spectra (100MHz, 99%  $\text{D}_2\text{O}$ , 298 K) of  $\text{CyP}_4\text{TD}[4]$ .

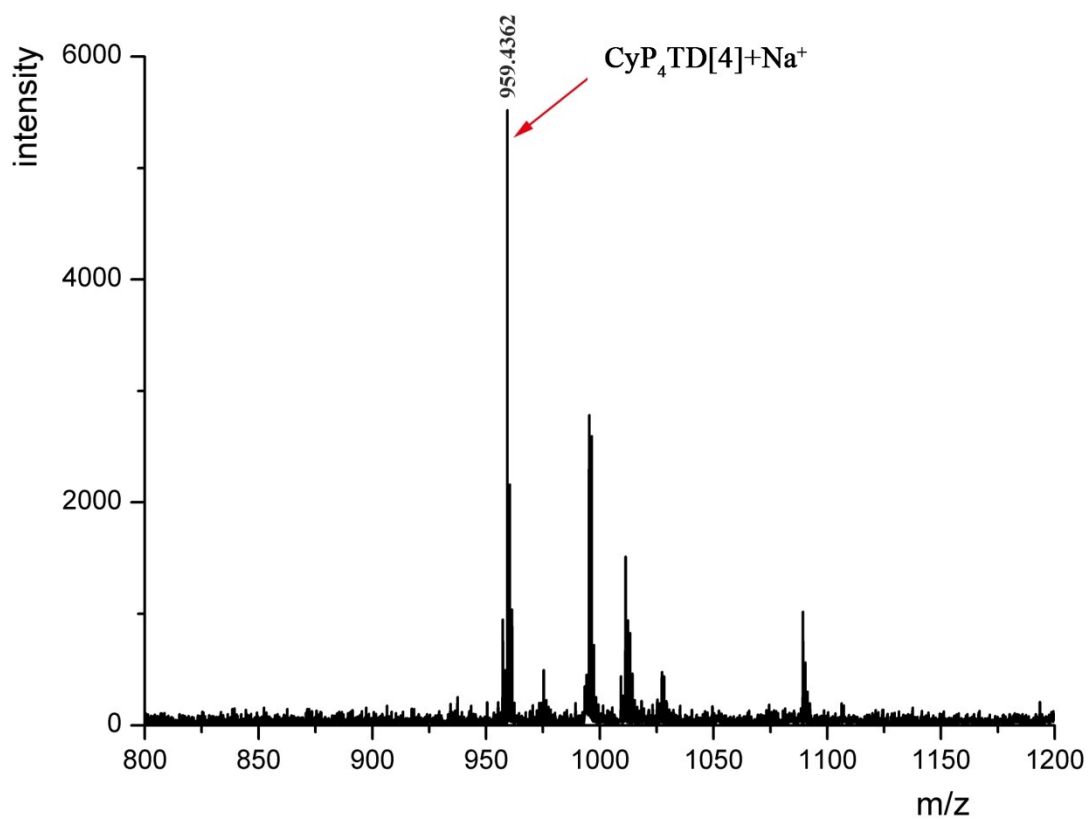

**Fig. S10** MALDI-TOF of  $\text{CyP}_4\text{TD}[4]$ :  $m/z$  959.4362  $[\text{M}+\text{Na}]^+$ .

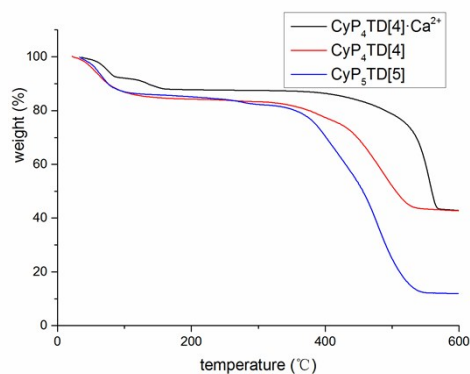

**Fig. S11** Thermogravimetric analysis of **CyP<sub>4</sub>TD[4]** in the presence and absence of **Ca<sup>2+</sup>** and **CyP<sub>5</sub>TD[5]**.

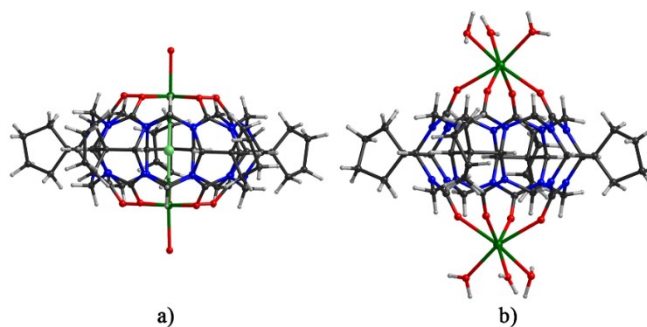

**Fig. S12** The single crystal structures of **CyP<sub>5</sub>TD[5]-CaCl<sub>2</sub>** (a) and **CyP<sub>4</sub>TD[4]-CaCl<sub>2</sub>** (b).

华东理工大学分析测试中心  
原子光谱室  
试验数据

|       |                                                    |                                          |
|-------|----------------------------------------------------|------------------------------------------|
| 部门    | 精细所                                                |                                          |
| 试样名称  | o/c                                                |                                          |
| 仪器型号  | 1、Varian 710ES <input checked="" type="checkbox"/> | 2、Agilent 725ES <input type="checkbox"/> |
|       | 3、ZEEhit 600 <input type="checkbox"/>              | 4、Mercur <input type="checkbox"/>        |
| 编号    | 81486                                              |                                          |
| 试验日期  | 2016.4.28                                          |                                          |
| 试样结果: | <p>wq-xlx-01 Ca: 2.7mg/l<br/>以下空白</p>              |                                          |

ECUST-560-01

**Fig. S13** The result of the atomic absorption spectrum test for the calcium content of **CyP<sub>4</sub>TD[4]** solution ( $3.3 \times 10^{-5}$  mol/L). The concentration of  $\text{Ca}^{2+}$  was 2.7 mg/L ( $6.75 \times 10^{-5}$  mol/L), indicating an about 1:2 complexation between **CyP<sub>4</sub>TD[4]** and  $\text{Ca}^{2+}$ .

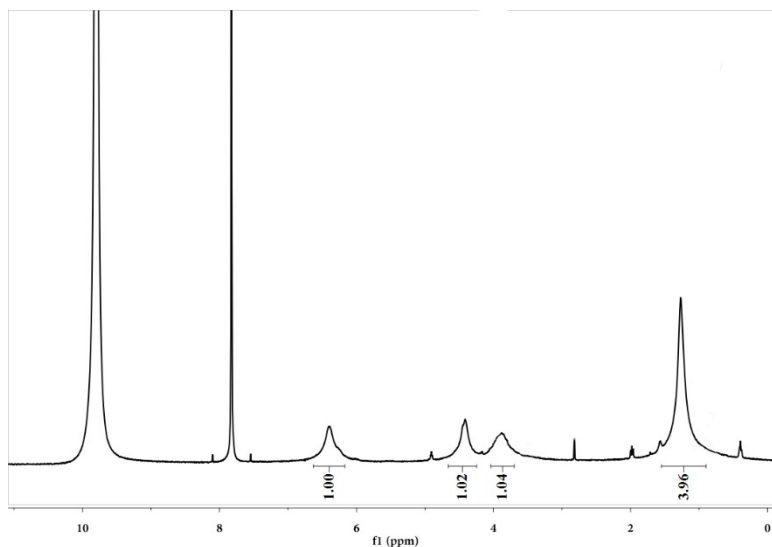

**Fig. S14**  $^1\text{H}$  NMR spectra (400 MHz, 99%  $\text{DCOOD}$ , 298 K) of **CyP<sub>4</sub>TD[4]**.

华东理工大学分析测试中心  
元素分析实验数据

编号: 20160410

|        |                           |       |       |             |
|--------|---------------------------|-------|-------|-------------|
| 送样单位   | 化学学院                      |       |       |             |
| 样品名称   | WYF-01, XLX-01            |       |       |             |
| 测试内容   | N, C, H 元素含量              |       |       |             |
| 测试仪器   | 德国 elementar vario EL III |       |       |             |
| 分析结果:  |                           |       |       |             |
| 样品名称   | 称样量 (mg)                  | N%    | C%    | H%          |
| WYF-01 | 1.719                     | 23.63 | 56.10 | 5.96        |
| WYF-01 | 1.586                     | 23.69 | 56.32 | 6.18        |
| 以下空白   |                           |       |       |             |
|        |                           |       |       | 测试日期        |
|        |                           |       |       | 2016年12月14日 |

**Fig. S15** The Element Analysis of **CyP<sub>4</sub>TD[4]** (WYF-01). Calcd for  $\text{C}_{44}\text{H}_{56}\text{O}_8\text{N}_{16}$ (**CyP<sub>4</sub>TD[4]**): C, 56.41; H, 5.98; N, 23.93. Found: C, 56.10; H, 5.96; N, 23.63.

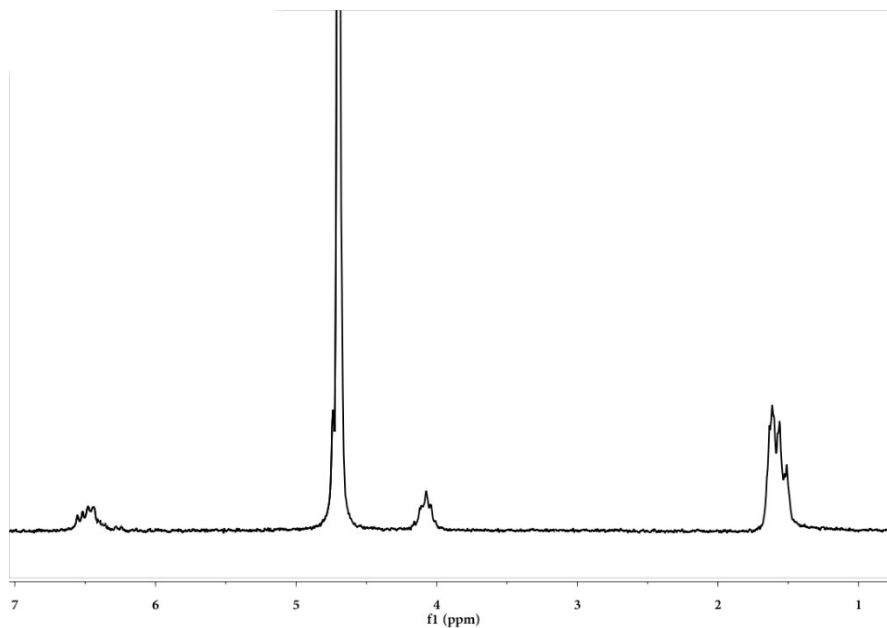

**Fig. S16**  $^1\text{H}$  NMR spectra (400MHz, 99% DCOOD, 298 K) of white precipitate from filtrate in the reaction of **CyP<sub>4</sub>TD[4]** (bottom).

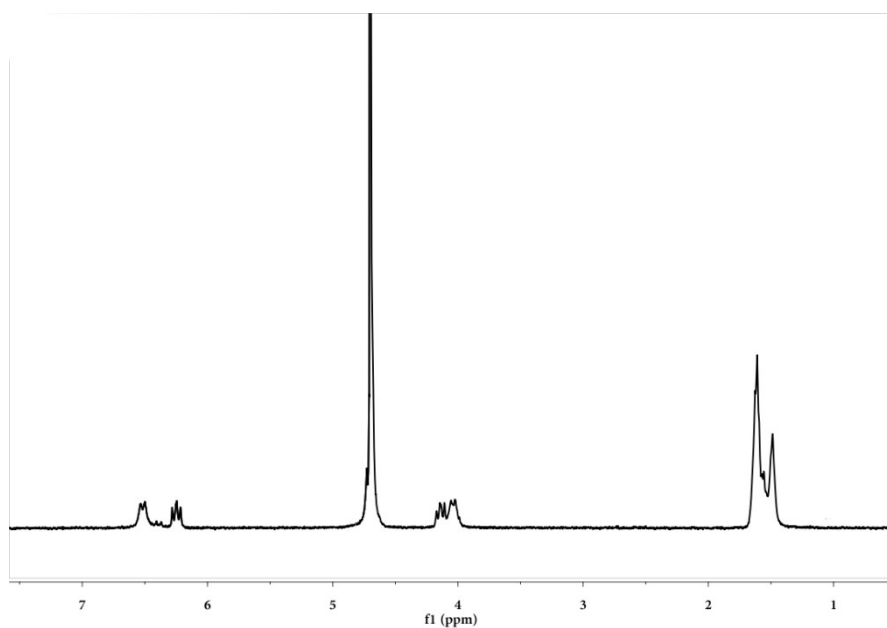

**Fig. S17**  $^1\text{H}$  NMR spectra (400MHz, 99% DCOOD, 298 K) of white precipitate from the filtrate in the reaction of **CyP<sub>5</sub>TD[5]**.

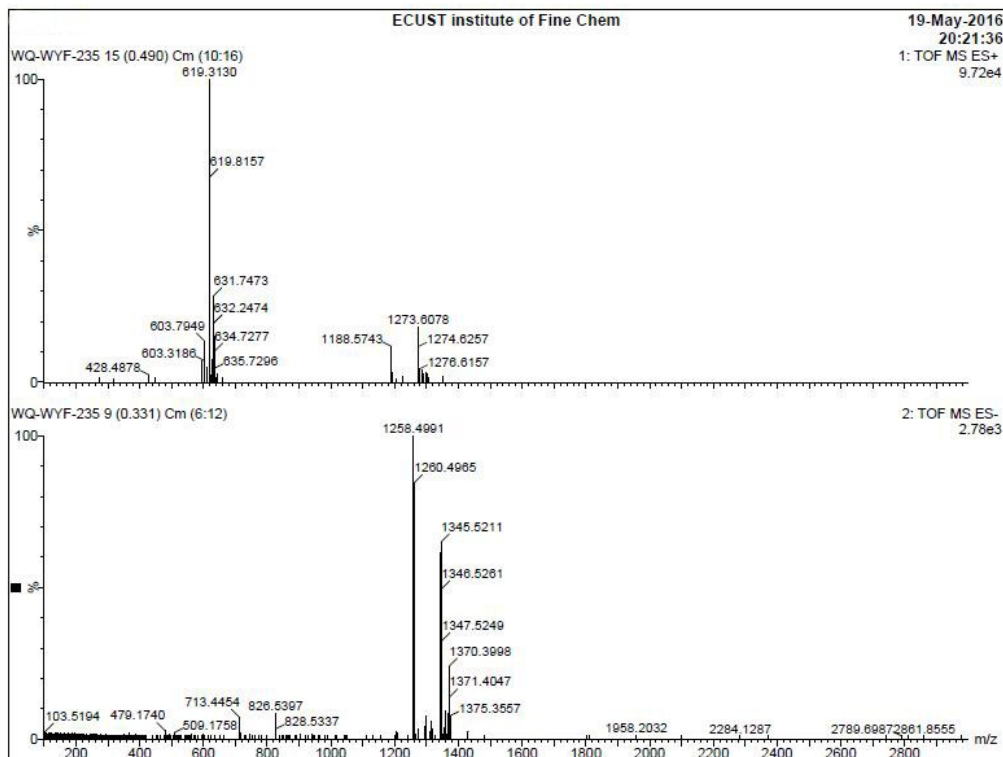

**Fig. S18** ESI-MS of the filtrate in the reaction of **CyP<sub>5</sub>TD[5]**.

## 7. Details of the X-ray Crystal Structure

|                        | CyP <sub>5</sub> TD[5]                                                                                  | CyP <sub>4</sub> TD[4]                                                                          |
|------------------------|---------------------------------------------------------------------------------------------------------|-------------------------------------------------------------------------------------------------|
| Chemical formula       | C <sub>55</sub> Ca <sub>2</sub> Cl <sub>4</sub> H <sub>76</sub> O <sub>25</sub> N <sub>20</sub>         | C <sub>44</sub> H <sub>76</sub> Ca <sub>2</sub> Cl <sub>4</sub> N <sub>16</sub> O <sub>18</sub> |
| Formula weight         | 1639.31                                                                                                 | 1339.17                                                                                         |
| Temperature            | 173(2) K                                                                                                | 203(2) K                                                                                        |
| Wavelength             | 0.71073 Å                                                                                               | 0.71073 Å                                                                                       |
| Crystal system         | Triclinic                                                                                               | Monoclinic                                                                                      |
| Space group            | P -1                                                                                                    | P 21/c                                                                                          |
| Unit cell dimensions   | a=15.086(4) Å<br>b=17.048(4) Å<br>c=17.876(8) Å<br>α= 103.160(5) °<br>β=110.463(6) °<br>γ= 107.684(4) ° | a=12.6660(10) Å<br>b=20.7418(16) Å<br>c=11.6720(9) Å<br>α=90 °<br>β=111.6460(10) °<br>γ=90 °    |
| Volume                 | 3806(2) Å <sup>3</sup>                                                                                  | 2850.2(4) Å <sup>3</sup>                                                                        |
| Z                      | 2                                                                                                       | 2                                                                                               |
| Density (calculated)   | 1.385 Mg/cm <sup>3</sup>                                                                                | 1.560 Mg/cm <sup>3</sup>                                                                        |
| Absorption coefficient | 0.371 mm <sup>-1</sup>                                                                                  | 0.473 mm <sup>-1</sup>                                                                          |
| F(000)                 | 1668                                                                                                    | 1408.0                                                                                          |

|                                   |                                             |                                             |
|-----------------------------------|---------------------------------------------|---------------------------------------------|
| Crystal size                      | 0.600×0.350×0.270 mm <sup>3</sup>           | 0.250×0.200×0.080 mm <sup>3</sup>           |
| Theta range for data collection   | 1.311 to 25.999°                            | 1.964 to 26.439°                            |
| Index ranges                      | -18≤h≤18, -20≤k≤21, -22≤l≤15                | -14≤h≤15, -24≤k≤25, -14≤l≤14                |
| Reflections collected             | 23780                                       | 17930                                       |
| Independent reflections           | 14662[R(int) = 0.0387]                      | 5836[R(int) = 0.0202]                       |
| Completeness to theta = 25.242°   | 97.9 %                                      | 99.5 %                                      |
| Absorption correction             | Semi-empirical from equivalents             | Semi-empirical from equivalents             |
| Max. and min. transmission        | 0.746 and 0.604                             | 0.745 and 0.689                             |
| Refinement method                 | Full-matrix least-squares on F <sup>2</sup> | Full-matrix least-squares on F <sup>2</sup> |
| Data / restraints / parameters    | 14662 / 2 / 919                             | 5836 / 57 / 454                             |
| Goodness-of-fit on F <sup>2</sup> | 1.483                                       | 1.068                                       |
| Final R indices [I>2sigma(I)]     | R1 = 0.1187<br>wR2 = 0.3621                 | R1 = 0.0437<br>wR2 = 0.1323                 |
| R indices (all data)              | R1 = 0.1471<br>wR2 = 0.3927                 | R1 = 0.0533<br>wR2 = 0.1461                 |
| Extinction coefficient            | n/a                                         | n/a                                         |
| Largest diff. peak and hole       | 1.797 and -0.985 e.Å <sup>-3</sup>          | 1.031 and -0.377 e.Å <sup>-3</sup>          |

## References

- [1] D. Domin, D. Benito-Garagorri, K. Mereiter, J. Fröhlich, K. Kirchner, *Organometallics*. 2005, **24**, 3957.
